# Supplementary material for: Magnetoelectric investigations on poly(vinylidene fluoride)/NiFe2O4flexible films fabricated through a solution casting method
Source: Royal Society of Chemistry journal article supplement (doi:10.1039/c6ra18032a), 2016-01-01
Supplement: c6ra18032a1.pdf [file c6ra18032a1.pdf]

## Magnetolectric investigations on Poly (vinylidene fluoride)/NiFe<sub>2</sub>O<sub>4</sub> flexible films fabricated through solution casting method

T. Prabhakaran<sup>a</sup> and J. Hemalatha<sup>a\*</sup>

Advanced Materials Lab, Department of Physics, National Institute of Technology, Tiruchirappalli, Tamilnadu, India – 620 015.

Email: hemalatha @nitt.edu, Phone: +914312503608

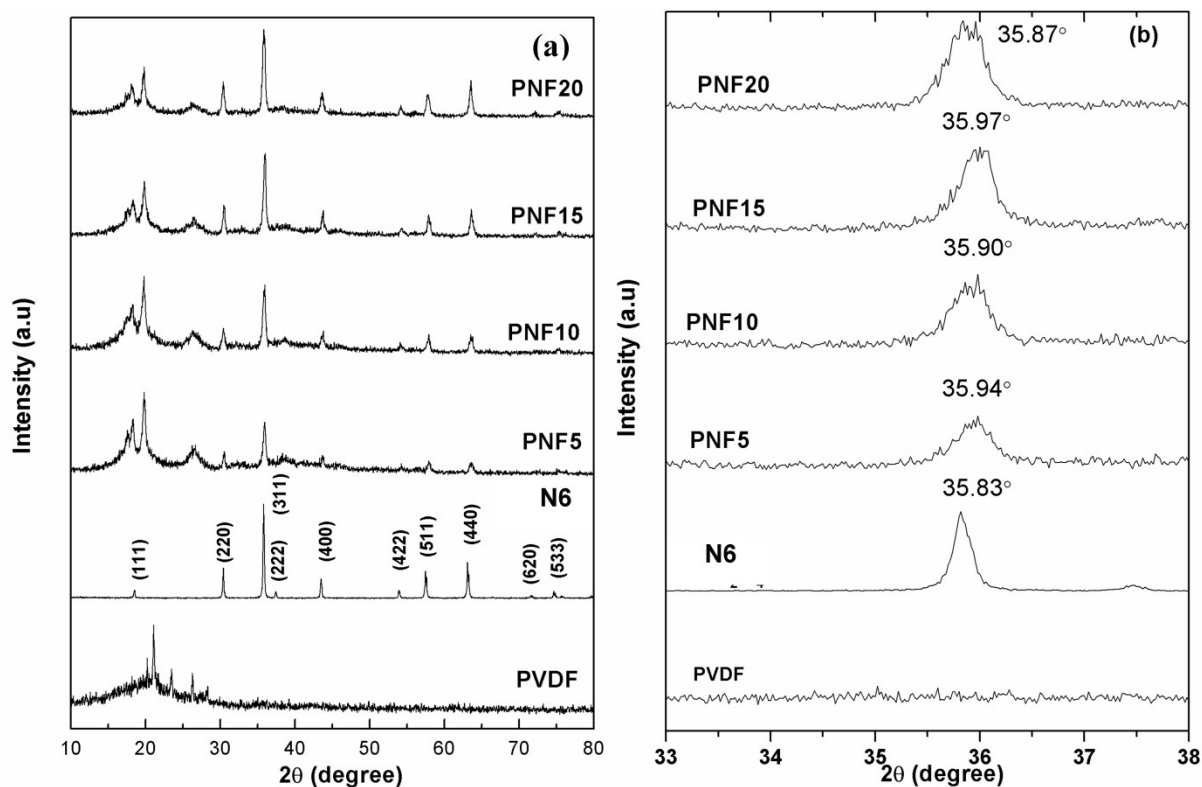

Fig.Es.1 (a) X-ray diffraction pattern of NiFe<sub>2</sub>O<sub>4</sub>, PVDF and PVDF/NiFe<sub>2</sub>O<sub>4</sub> composite films and (b) Shift of (311) plane of NiFe<sub>2</sub>O<sub>4</sub> in PVDF matrix.

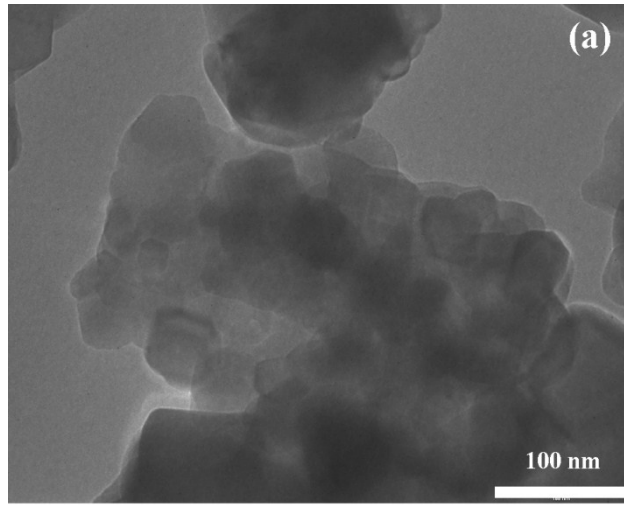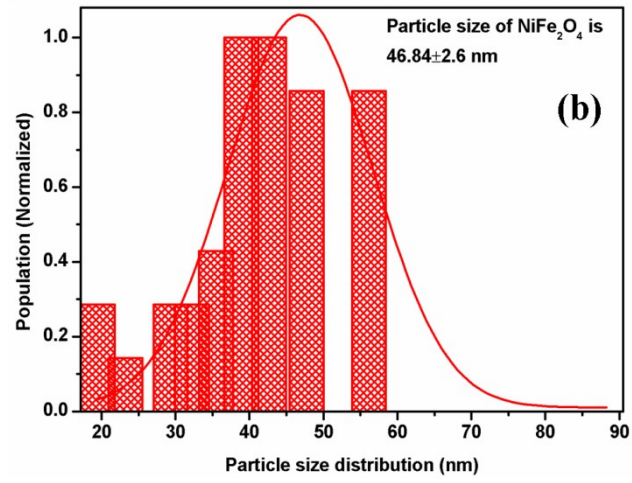

Fig.Es.2 (a) TEM and (b) particle size distribution of  $\text{NiFe}_2\text{O}_4$  nanoparticles

Table Es.1. List of absorption bands and the assignment of functional groups

| Sample | Wave number (cm <sup>-1</sup> ) | Assignment                                               | F( $\beta$ )<br>% |
|--------|---------------------------------|----------------------------------------------------------|-------------------|
| PVDF   | 762                             | CF <sub>2</sub> bending and skeletal bending of $\alpha$ | 37.2              |
|        | 795.0                           | CH <sub>2</sub> rocking of $\alpha$                      |                   |
|        | 838.9                           | CH <sub>2</sub> rocking of $\beta$                       |                   |
|        | 853.9, 871.2, 974.4             | C-H out of plane bending of $\alpha$ phase               |                   |
|        | 1067.5                          | C-C anti-symmetric stretching of $\beta$                 |                   |
| PNF5   | 762.2                           | CF <sub>2</sub> bending and skeletal bending of $\alpha$ | 31.4              |
|        | 794.5                           | CH <sub>2</sub> rocking of $\alpha$                      |                   |
|        | 841.8                           | CH <sub>2</sub> rocking of $\beta$                       |                   |
|        | 854.3, 869.7, 974.8             | C-H out of plane bending of $\alpha$ phase               |                   |
|        | 1066.9                          | C-C anti-symmetric stretching of $\beta$                 |                   |
| PNF10  | 762.2                           | CF <sub>2</sub> bending and skeletal bending of $\alpha$ | 35.9              |
|        | 794.5                           | CH <sub>2</sub> rocking of $\alpha$                      |                   |
|        | 839.9                           | CH <sub>2</sub> rocking of $\beta$                       |                   |
|        | 855.3, 869.7, 974.4             | C-H out of plane bending of $\alpha$ phase               |                   |
|        | 1066.9                          | C-C anti-symmetric stretching of $\beta$                 |                   |
| PNF15  | 762.2                           | CF <sub>2</sub> bending and skeletal bending of $\alpha$ | 33.2              |
|        | 795.0                           | CH <sub>2</sub> rocking of $\alpha$                      |                   |
|        | 841.8                           | CH <sub>2</sub> rocking of $\beta$                       |                   |
|        | 853.8, 869.7, 974.4             | C-H out of plane bending of $\alpha$ phase               |                   |
|        | 1066.9                          | C-C anti-symmetric stretching of $\beta$                 |                   |
| PNF20  | 762.2                           | CF <sub>2</sub> bending and skeletal bending of $\alpha$ | 32.9              |
|        | 795.0                           | CH <sub>2</sub> rocking of $\alpha$                      |                   |
|        | 853.8, 870.2, 974.4             | C-H out of plane bending of $\alpha$ phase               |                   |
|        | 840.8                           | CH <sub>2</sub> rocking of $\beta$                       |                   |
|        | 1066.9                          | C-C anti-symmetric stretching of $\beta$                 |                   |

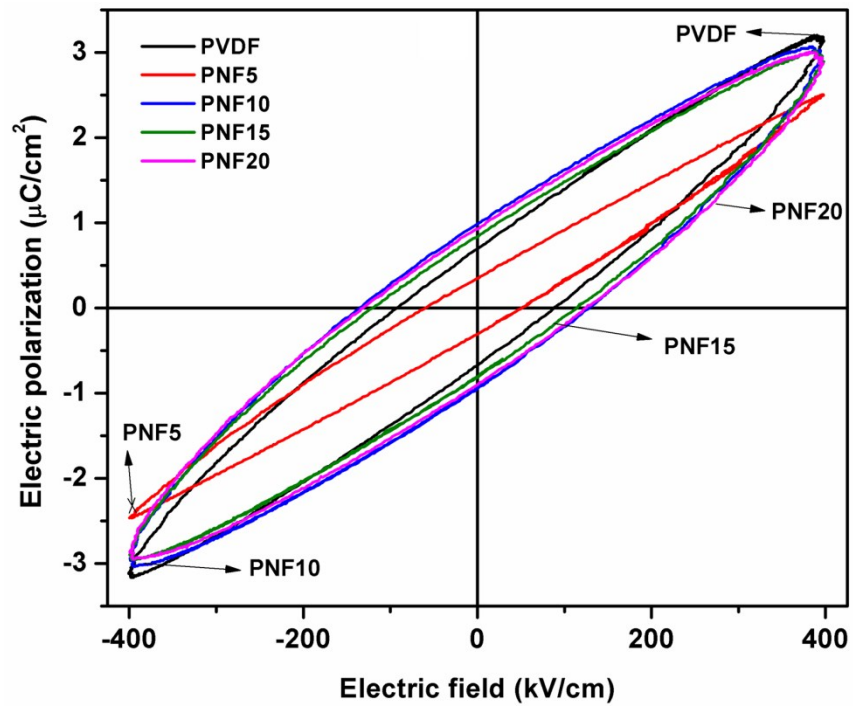

Fig.Es.3. Ferroelectric hysteresis loops of PVDF and PVDF/NiFe<sub>2</sub>O<sub>4</sub> films

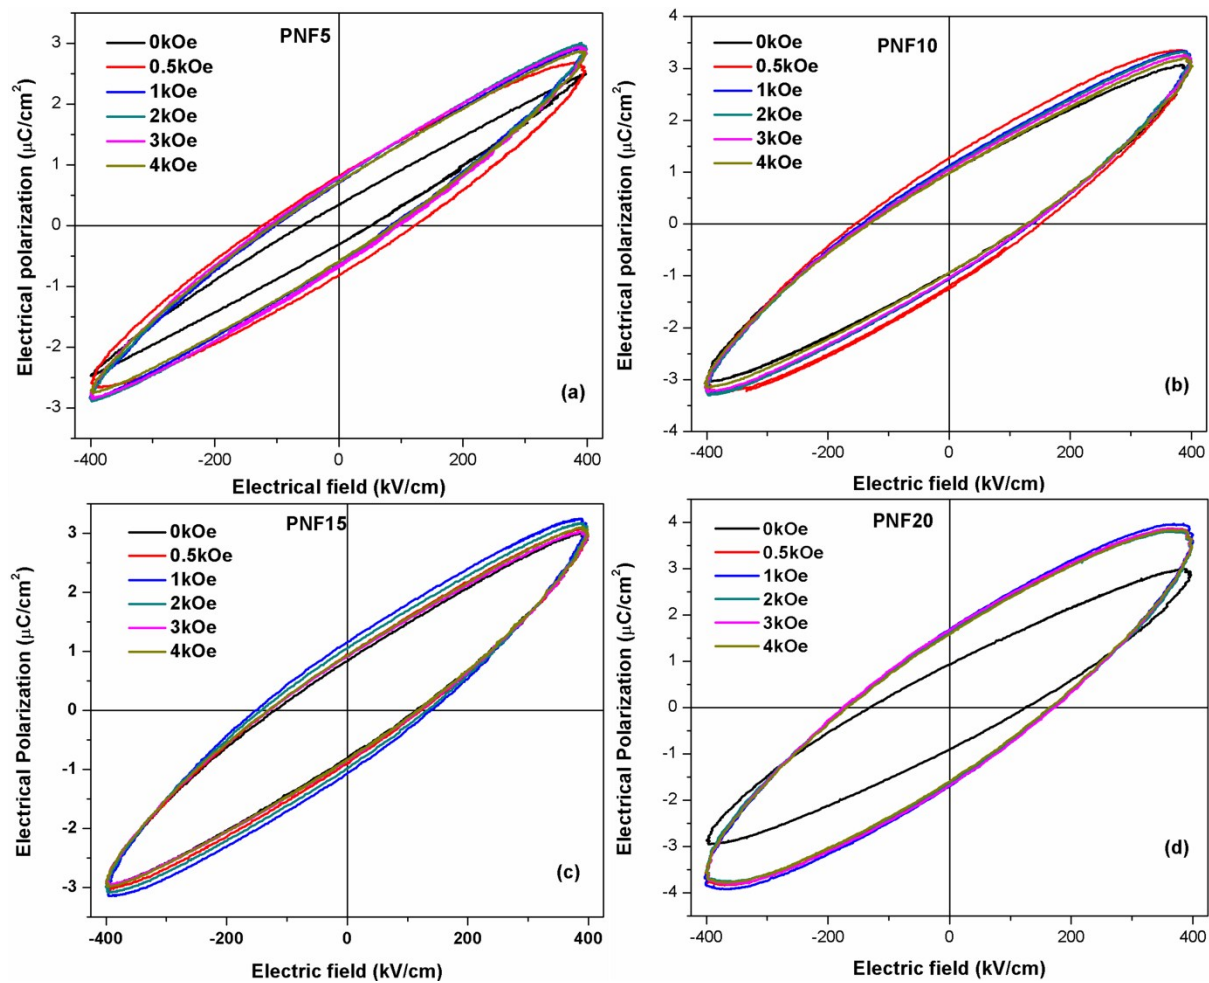

Fig.Es.4 (a) to (d) Ferroelectric responses of PVDF/ $\text{NiFe}_2\text{O}_4$  films in different magnetic fields
